# Supplementary material for: Targeting the MYC Oncogene in Burkitt Lymphoma through HSP90 Inhibition
Source: MDPI journal article supplement (doi:10.3390/cancers10110448), 2018-11-16
Supplement: s1 [file s1]

# Supplementary Materials: Targeting the MYC Oncogene in Burkitt Lymphoma through HSP90 Inhibition

Candace J. Poole, Wenli Zheng, Haesung Lee, Danielle Young, Atul Lodh, Ahmed Chadli and Jan van Riggelen

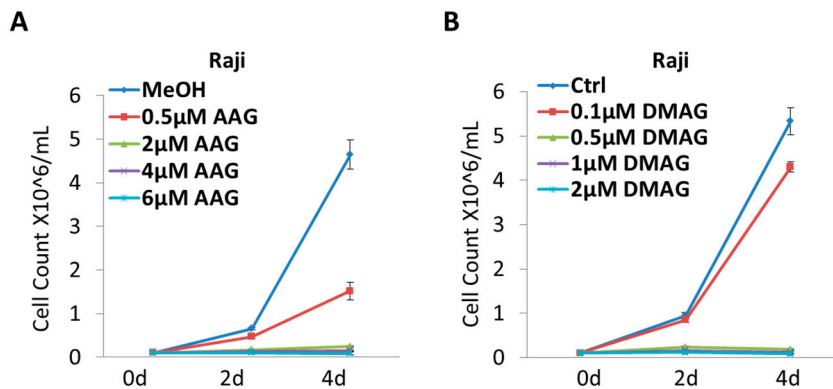

**Figure S1.** Dose response curve for 17-AAG and 17-DMAG treatment on Burkitt Lymphoma. Dose response growth curve on Raji Burkitt Lymphoma cell line with (A) 0.5–6 μM 17-AAG compared to Methanol (MeOH) control; and (B) 0.1–2 μM 17-DMAG compared to untreated control.

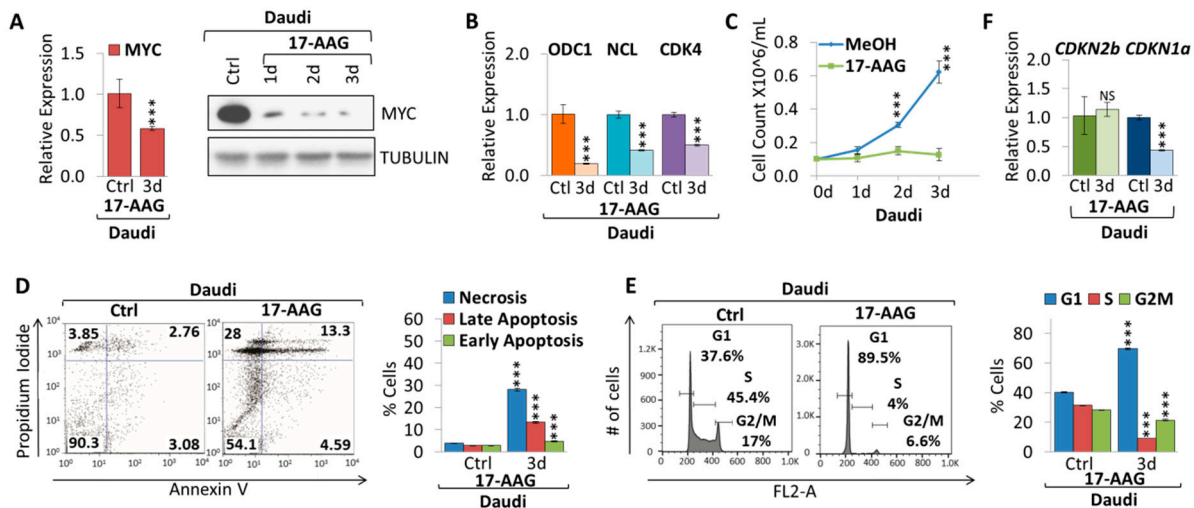

**Figure S2.** 17-AAG treatment downregulates MYC expression and caused decreased tumor cell proliferation, apoptosis, and cell cycle arrest in Daudi cells. (A) RT-qPCR and WB of MYC expression upon 4 μM 17-AAG treatment over the course of four days; Tubulin is used as a WB loading control. (B) RT-qPCR of canonical MYC target genes: *CDK4*, *NCL*, and *ODC1* upon three days treatment of 4 μM 17-AAG or methanol control. (C) Growth curve of cells treated with methanol control or 4 μM 17-AAG over the course of four days. (D) Flow cytometry profile of AnnexinV staining (X axis) and PI (Y axis) upon three days treatment with 4 μM 17-AAG. The lower right quadrant indicates the percentage of early apoptotic cells in each condition; the upper right quadrant indicates the percentage of late apoptotic cells; the upper left quadrant indicates percentage of necrotic cells; and the left lower quadrant indicates percentage of live/non-apoptotic cells. Apoptotic cells (Annexin V-positive cells) are displayed as the percentage of gated cells. (E) Flow cytometric cell cycle analysis

using propidium iodide (PI) staining upon three days treatment with 4  $\mu$ M 17-AAG. Cell cycle distribution (G1, S and G2/M) are displayed in percent. (F) RT-qPCR of *CDKN2b* and *CDKN1a* upon three day treatment of 4  $\mu$ M 17-AAG or methanol control. RT-qPCR was normalized to *RPL13a*; Tubulin was used as a loading control for WB. Error bars represent mean  $\pm$  SEM; n = 3; two-tailed Student's *t*-test: NS = not significant; \*  $p < 0.05$ ; \*\*  $p < 0.01$ ; \*\*\*  $p < 0.001$ .

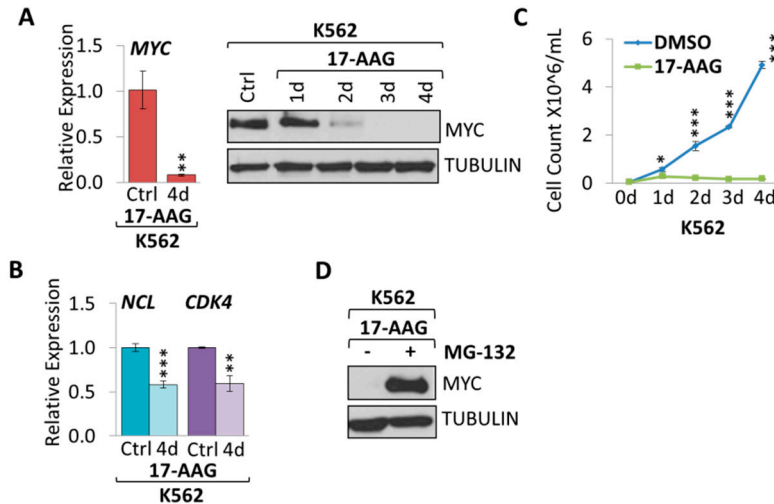

**Figure S3.** 17-AAG treatment causes MYC downregulation and proteasomal degradation of MYC protein in Chronic Myeloid Leukemia. (A) RT-qPCR and WB of MYC expression upon 4  $\mu$ M 17-AAG treatment or DMSO control over the course of four days. (B) RT-qPCR of canonical MYC target genes: *CDK4* and *NCL*, upon four days treatment of 4  $\mu$ M 17-AAG or DMSO control. (C) Growth curve of cells treated with DMSO control or 4  $\mu$ M 17-AAG over the course of four days. (D) WB of MYC expression upon 4  $\mu$ M 17-AAG and 10  $\mu$ M MG-132 combination treatment over four hours. RT-qPCR was normalized to *RPL13a*; Tubulin was used as a loading control for WB. Error bars represent mean  $\pm$  SEM; n = 3; two-tailed Student's *t*-test: \*  $p < 0.05$ ; \*\*  $p < 0.01$ ; \*\*\*  $p < 0.001$ .

**Table S1.** RT-qPCR primers

| Gene             | Forward                | Reverse                |
|------------------|------------------------|------------------------|
| Hs <i>MYC</i>    | CTGCGACGAGGAGGAGAA     | GGCAGCAGCTCGAATTTCTT   |
| Hs <i>CDK4</i>   | ATGGCTACCTCTCGATATGAGC | CATTGGGGACTCTCACACTCT  |
| Hs <i>NCL</i>    | GCACCTGGAAAACGAAAGAAGG | GAAAGCCGTAGTCGGTCTGT   |
| Hs <i>ODC1</i>   | TTTACTGCCAAGGACATTCTGG | GGAGAGCTTTTAACCACCTCAG |
| Hs <i>CDKN1A</i> | TGTCGTCAGAACCCATGC     | AAAGTCGAAGTTCATCGCTC   |
| Hs <i>CDKN2B</i> | GATGTGCAAGCGACGACAGA   | GAGCAAAGGCCAGCATCCT    |
| Hs <i>RPL13A</i> | CTGGAAGATGGTCGTACCCTG  | GGTCTTGCCAGTGAGTGTCT   |

**Table S2.** ChIP-qPCR tiling primers

| Amplicon | Relative/Absolute Location                                      | Forward               | Reverse               |
|----------|-----------------------------------------------------------------|-----------------------|-----------------------|
| 1        | Chr14. 105,862,121/ 105,862,226                                 | AGGTCACCCGCGAGAGTCTAT | GCACTTTCAGATCTGGGCCT  |
| 2        | Chr14. 105,582,220/ 105,582,343<br>and 105,701,268/ 105,701,391 | GCCAGGTCTCGACTTAGCAC  | TGGGGTACAAGAGGCTTCAG  |
| 3        | Chr14. 105,575,299/ 105,575,593<br>and 105,696,320/ 105,696,508 | TCCAGAAATAGCTTGACGGA  | AGTAACCCAAGTGGGCCTGT  |
| 4        | Chr14. 105,566,448/ 105,566,625<br>and 105,686,292/ 105,686,469 | GGCTGGACACACTAGCAGGT  | CTGCTCTGTGGTTCCCATTT  |
| 5        | -2,163bp/ -2,255bp from <i>MYC</i><br>TSS                       | AACACTTGAACGCTGAGCTG  | CCACCACCTCCAAAAGAGAA  |
| 6        | -688bp/ -785bp from <i>MYC</i> TSS                              | GAGCAGCAGAGAAAGGGAGA  | CAGCCGAGCACTCTAGCTCT  |
| 7        | -438bp/ -534bp from <i>MYC</i> TSS                              | TTTATAATGCGAGGGTCTGGA | AGAAGCCCTGCCCTTCTC    |
| 8        | -240bp/ -387bp from <i>MYC</i> TSS                              | GGGATCGCGCTGAGTATAAA  | CCTATTCGCTCCGGATCTC   |
| 9        | 754bp/ 920bp from <i>MYC</i> TSS                                | GGGATCGCGCTGAGTATAAA  | CCTATTCGCTCCGGATCTC   |
| 10       | 1,820bp/ 1,917bp from <i>MYC</i> TSS                            | AGGTGTTAGGACGTGGTGTG  | CCCTGGTTTTTCCAAGTCAA  |
| 11       | 2,881bp/ 2,996bp from <i>MYC</i> TSS                            | CGGTGCAGCCGTATTCTAC   | CAGCAGCTCGAATTTCTTCC  |
| 12       | 3,576bp/ 3,670bp from <i>MYC</i> TSS                            | AGCGACTCTGGTAAGCGAAG  | AGTGGCCCGTTAAATAAGCTG |

|    |                               |                        |                      |
|----|-------------------------------|------------------------|----------------------|
| 13 | 4,990bp/ 5,083bp from MYC TSS | CGATGTTGTTTCTGTGGAAAAG | GCTGTGAGGAGGTTTGCTGT |
| 14 | 5,425bp/ 5,522bp from MYC TSS | AGCAGAGGAGCAAAAGCTCA   | ACGCACAAGAGTCCGTAGC  |

---
